# Supplementary material for: Hierarchically scaffolded CoP/CoP2 nanoparticles: controllable synthesis and their application as a well-matched bifunctional electrocatalyst for overall water splitting
Source: Royal Society of Chemistry journal article supplement (doi:10.1039/c7nr01017f), 2017-01-01
Supplement: c7nr01017f1.pdf [file c7nr01017f1.pdf]

## **Electronic Supplementary Information**

**Hierarchically scaffolded CoP/CoP<sub>2</sub> nanoparticles: controllable synthesis and their application as a well-matched bi-functional electrocatalyst for overall water splitting**

Wan Li, Shilin Zhang, Qining Fan, Fazhi Zhang, Sailong Xu\*

State Key Laboratory of Chemical Resource Engineering, Beijing University of Chemical Technology, Beijing 100029, China.

Email: xusl@mail.buct.edu.cn

**Figure S1**

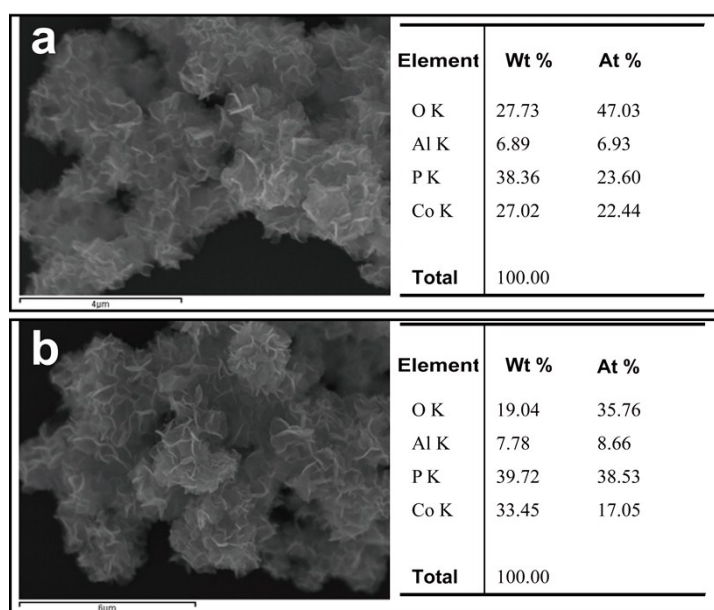

**Fig. S1** SEM/EDX images of (a) f-CoP/Al<sub>2</sub>O<sub>3</sub> electrocatalyst and (b) f-CoP/CoP<sub>2</sub>/Al<sub>2</sub>O<sub>3</sub> electrocatalyst.

Figure S2

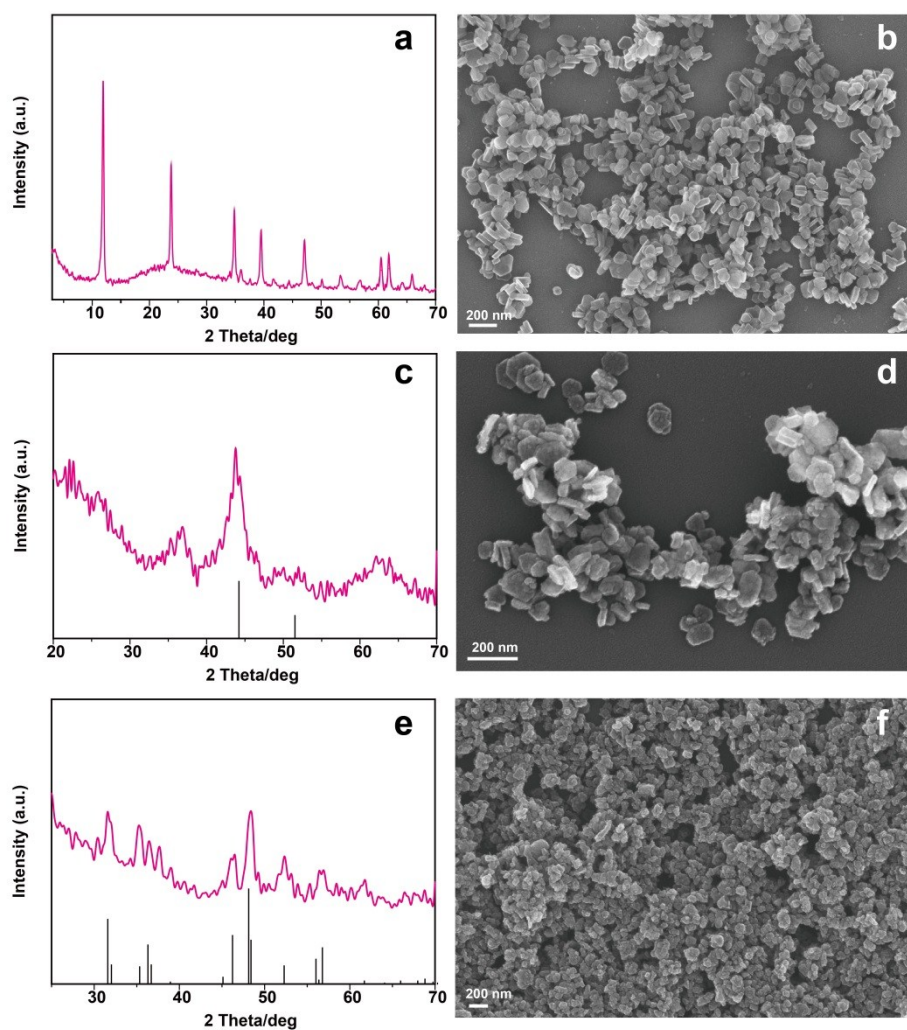

**Fig. S2** (a) XRD pattern and (b) SEM images of p-CoAl-LDH precursor, (c) XRD pattern and (d) SEM images of p-Co/Al<sub>2</sub>O<sub>3</sub> nanoparticles formed after reduction of p-CoAl-LDH precursor, (e) XRD pattern and (f) SEM images of p-CoP/Al<sub>2</sub>O<sub>3</sub> composite formed after short-duration phosphorization of p-Co/Al<sub>2</sub>O<sub>3</sub>.

Figure S3

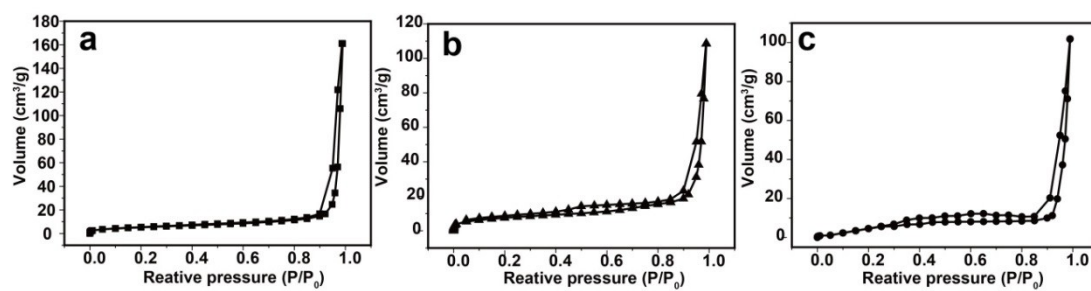

**Fig. S3**  $\text{N}_2$  adsorption/desorption isotherm of (a) p-CoP/ $\text{Al}_2\text{O}_3$ , (b) f-CoP/ $\text{Al}_2\text{O}_3$ , and (c) f-CoP/ $\text{CoP}_2$ / $\text{Al}_2\text{O}_3$  composites.

Figure S4

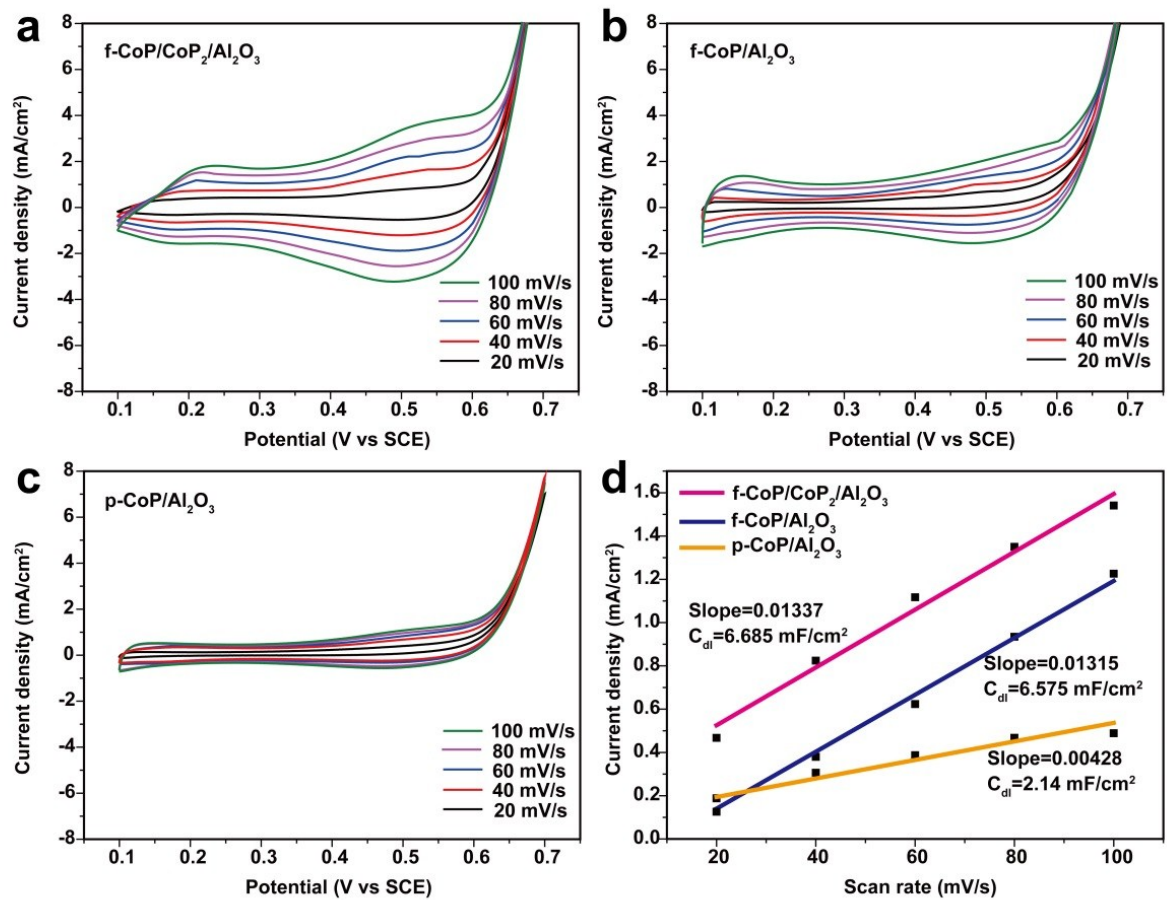

**Fig. S4** Cyclic voltammograms (CVs) for (a) f-CoP/CoP<sub>2</sub>/Al<sub>2</sub>O<sub>3</sub>, (b) f-CoP/Al<sub>2</sub>O<sub>3</sub>, (c) p-CoP/Al<sub>2</sub>O<sub>3</sub> measured at different scan rates from 20 to 100 mV/s and (d) corresponding plots of the current density at 0.2 V vs SCE at the scan rate.

---

**Figure S5**

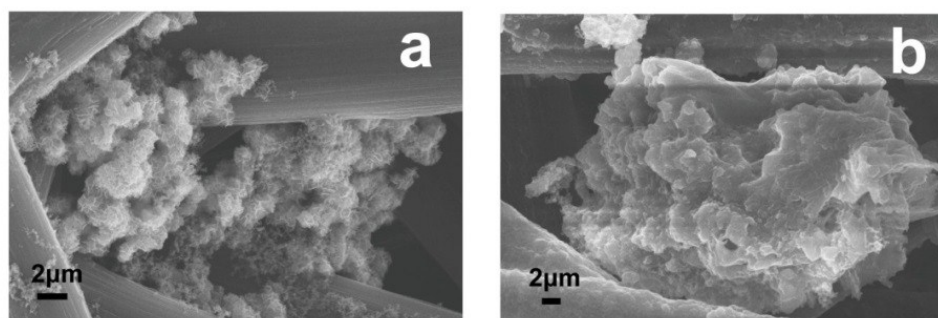

**Fig. S5** The SEM images of f-CoP/CoP<sub>2</sub>/Al<sub>2</sub>O<sub>3</sub> electrode which is adhesion in carbon paper (a) before electrochemical testing, (b) after electrochemical testing for 24h.

**Table S1**

Comparison of OER performance in alkaline electrolytes for f-CoP/CoP<sub>2</sub>/Al<sub>2</sub>O<sub>3</sub> composite and some reported high-efficient non-noble metal phosphides based OER electrocatalysts.

| Catalyst                                               | Loading mass (mg cm <sup>-2</sup> ) | Electrolyte | Over-potential at 10 mA cm <sup>-2</sup> (mV) | Ref.      |
|--------------------------------------------------------|-------------------------------------|-------------|-----------------------------------------------|-----------|
| NiCoFe-LDHs/CFC                                        | 0.4                                 | 1.0 M KOH   | 234                                           | [1]       |
| Co NPs                                                 | 0.2                                 | 1.0 M KOH   | 390                                           | [2]       |
| NiCo <sub>2</sub> O <sub>4</sub>                       | 0.069                               | 1.0 M KOH   | 419.3                                         | [3]       |
| Co <sub>3</sub> O <sub>4</sub>                         | 0.136                               | 1.0 M KOH   | 410                                           | [4]       |
| NiCo-LDH                                               | 0.17                                | 1.0 M KOH   | 370                                           | [5]       |
| Sandwich-like CoP/C                                    | 0.36                                | 1.0 M KOH   | 330                                           | [6]       |
| CoP film                                               | ~                                   | 1.0 M KOH   | 345                                           | [7]       |
| CoP nanorod                                            | 0.71                                | 1.0 M KOH   | 320                                           | [8]       |
| p-CoP/Al <sub>2</sub> O <sub>3</sub>                   | 0.2                                 | 1.0 M KOH   | 357                                           | This work |
| f-CoP/Al <sub>2</sub> O <sub>3</sub>                   | 0.2                                 | 1.0 M KOH   | 320                                           | This work |
| f-CoP/CoP <sub>2</sub> /Al <sub>2</sub> O <sub>3</sub> | 0.2                                 | 1.0 M KOH   | 300                                           | This work |

**Reference:**

- [1] A. Wang, H. Xu, G. Li, *ACS Energy Lett.*, 2016, **1**, 445.
- [2] L. Wu, Q. Li, C. H. Wu, H. Zhu, *J. Am. Chem. Soc.*, 2015, **137**, 7071.
- [3] J. Wang, T. Qiu, X. Chen, Y. Lu, W. Yang, *J. Power Sources*, 2014, **268**, 341.
- [4] Y. Wang, T. Zhou, K. Jiang, P. Da, Z. Peng, J. Tang, B. Kong, W. B. Cai, Z. Yang, G. Zheng, *Adv. Energy Mater.*, 2014, **4**, 1400696.
- [5] H. Liang, F. Meng, M. Cabán-Acevedo, L. Li, A. Forticaux, L. Xiu, Z. Wang, S. Jin, *Nano Lett.*, 2015, **15**, 1421.
- [6] Y. Bai, H. Zhang, Y. Feng, L. Fang, Y. Wang, *J. Mater. Chem. A*, 2016, **4**, 9072.
- [7] N. Jiang, B. You, M. Sheng, Y. Sun, *Angew. Chem. Int. Ed.*, 2015, **54**, 6251.
- [8] J. Chang, Y. Xiao, M. Xiao, J. Ge, C. Liu, W. Xing, *ACS Catal.*, 2015, **5**, 6874.

**Table S2**

Comparison of HER performance in alkaline electrolytes for f-CoP/CoP<sub>2</sub>/Al<sub>2</sub>O<sub>3</sub> composite and some reported high-efficient non-noble metal phosphides based HER electrocatalysts.

| Catalyst                                               | Loading mass (mg cm <sup>-2</sup> ) | Electrolyte | Over-potential at 10 mA cm <sup>-2</sup> (mV) | Ref.      |
|--------------------------------------------------------|-------------------------------------|-------------|-----------------------------------------------|-----------|
| NiCoFe-LDHs/CFC                                        | 0.4                                 | 1.0 M KOH   | 200                                           | [1]       |
| CoP/CC                                                 | 0.92                                | 1.0 M KOH   | 209                                           | [2]       |
| FeP NAs/CC                                             | 1.5                                 | 1.0 M KOH   | 218                                           | [3]       |
| Fe <sub>2</sub> P/NGr                                  | 1.71                                | 1.0 M KOH   | 380                                           | [4]       |
| Amorphous MoS <sub>2</sub> /FTO                        | ~                                   | 1.0 M KOH   | 540                                           | [5]       |
| Ni wire                                                | 0.1                                 | 1.0 M NaOH  | 350                                           | [6]       |
| Ni-Mo alloy/Ti foil                                    | 1.0                                 | 2.0 M KOH   | 80                                            | [6]       |
| Co-NRCNTs                                              | 0.28                                | 1.0 M KOH   | 370                                           | [7]       |
| CP@Ni-P                                                |                                     | 1.0 M KOH   | 117                                           | [8]       |
| p-CoP/Al <sub>2</sub> O <sub>3</sub>                   | 0.2                                 | 1.0 M KOH   | 181                                           | This work |
| f-CoP/Al <sub>2</sub> O <sub>3</sub>                   | 0.2                                 | 1.0 M KOH   | 170                                           | This work |
| f-CoP/CoP <sub>2</sub> /Al <sub>2</sub> O <sub>3</sub> | 0.2                                 | 1.0 M KOH   | 138                                           | This work |

**Reference:**

- [1] A. Wang, H. Xu, G. Li, *ACS Energy Lett.*, 2016, **1**, 445.
- [2] J. Tian, Q. Liu, A. M. Asiri, X. Sun, *J. Am. Chem. Soc.*, 2014, **136**, 7587.
- [3] Y. Liang, Q. Liu, A. M. Asiri, X. Sun, Y. Luo, *ACS Catal.*, 2014, **4**, 4065.
- [4] Z. Huang, C. Lv, Z. Chen, Z. Chen, F. Tian, C. Zhang, *Nano Energy*, 2015, **12**, 666.
- [5] D. Merki, S. Fierro, H. Vrubel, X. Hu, *Chem. Sci.*, 2011, **2**, 1262.
- [6] J. R. McKone, B. F. Sadtler, C. A. Werlang, N. S. Lewis, H. B. Gray, *ACS Catal.*, 2013, **3**, 166.
- [7] X. Zou, X. Huang, A. Goswami, R. Silva, B. R. Sathe, E. Mikmekova, T. Asefa, *Angew. Chem. Int. Ed.*, 2014, **53**, 4372.
- [8] X. Wang, W. Li, D. Xiong, D. Y. Petrovykh, L. Liu, *Adv. Funct. Mater.*, 2016, **26**, 4067.
